# Supplementary material for: One-step synthesis, characterization and catalytic performance of hierarchical Zn-ZSM-11 via facile ZnO routes
Source: Royal Society of Chemistry journal article supplement (doi:10.1039/c4ra14375b), 2014-12-24
Supplement: c4ra14375b1.pdf [file c4ra14375b1.pdf]

**Electronic Supplementary Information (ESI) for**  
**One-step synthesis, characterization and catalytic performance of**  
**hierarchical Zn-ZSM-11 via facile ZnO routes**

Qingjun Yu <sup>a,b</sup>, Chunyi Li<sup>\*b</sup>, Xiaolong Tang<sup>\*a</sup> and Honghong Yi<sup>a</sup>

<sup>a</sup> *Department of Environmental Engineering, Civil and Environmental Engineering School, University of Science and Technology Beijing, Beijing 100083, China;*

<sup>b</sup> *State Key Laboratory of Heavy Oil Processing, China University of Petroleum (East China), Qingdao 266555, China*

*Corresponding author Fax: +86 532 86981787; Tel: +86 532 86981862; E-mail:*

[chyli\\_upc@126.com](mailto:chyli_upc@126.com); [txiaolong@126.com](mailto:txiaolong@126.com)

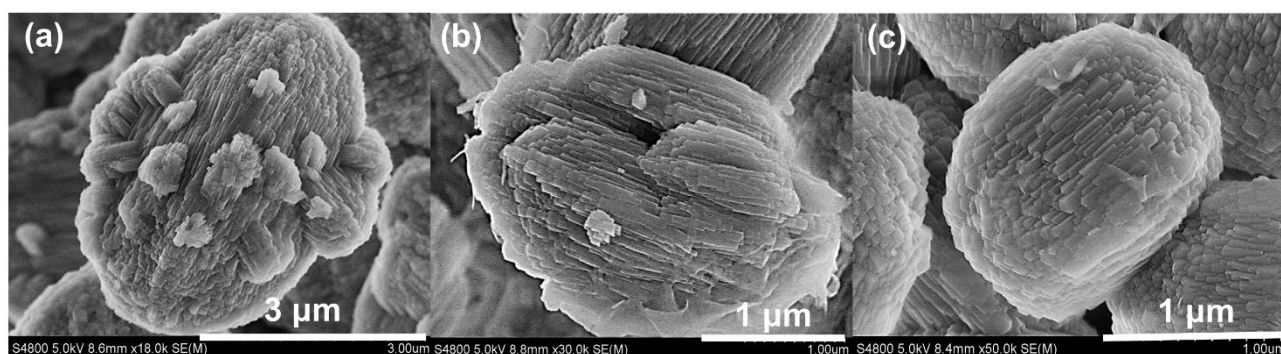

**Fig. S1** The enlarged SEM images of Zn-ZSM-11 samples prepared by the direct synthesis methods, showing that all the Zn-ZSM-11 samples are composed of large amounts of nanorod crystals (a) Z11-Zn[S]; (b) Z11-Zn[O]; (c) Z11-Zn[PreO]
